# Supplementary material for: An open-source remote heart rate imaging method with practical apparatus and algorithms
Source: PubMed Central journal article supplement (PMC6797647; doi:10.3758/s13428-019-01256-8), 2019-05-31
Supplement: 13428_2019_1256_MOESM1_ESM.pdf [file 13428_2019_1256_MOESM1_ESM.pdf]

# Supplementary Information

## Title

Standardized procedures for the testing and reporting of remote heart rate imaging with practicable equipment and algorithms

## Authors

Koen M. van der Kooij<sup>1</sup>, Marnix Naber<sup>1</sup>

<sup>1</sup>Experimental Psychology, Faculty of Social Sciences, Utrecht University, Heidelberglaan 1, 3584CS Utrecht, The Netherlands

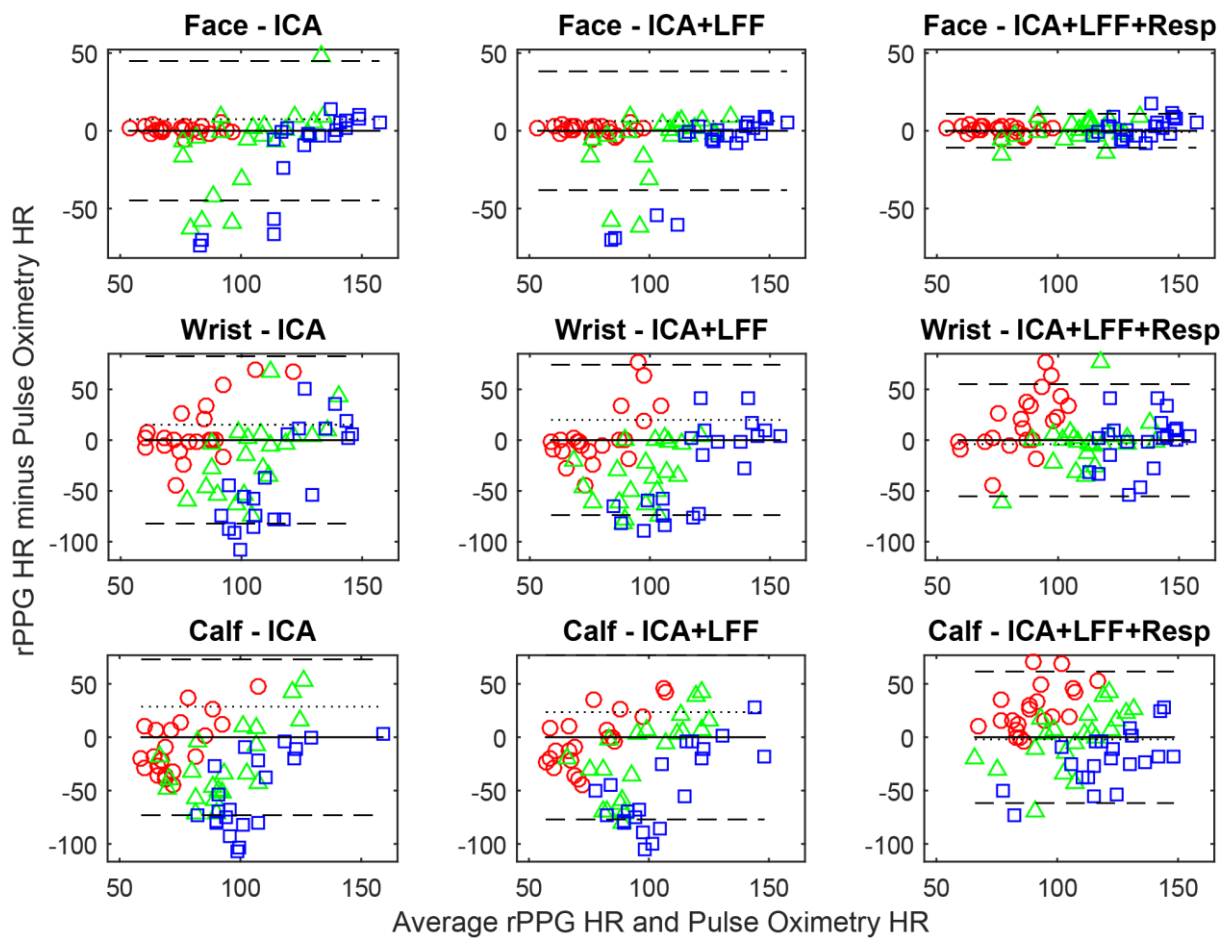

*Figure S1.* Alternative for scatterplots in Fig. 5. These Bland-Altman plots show the difference between rPPG and pulse oximetry heart rate measurements in beats per minute. Dotted lines indicate mean difference, dashed lines indicate the 1.96 standard deviation borders.
